# Supplementary material
Source: publisher figshare collection journal article supplement (https://gsajournals.figshare.com/ndownloader/files/20183153)
Supplement: Supplementary file 1 [file 20183153]

## Sheet: Sheet1
Table S5. List of indels identified in GJ0703 (A) and CT18 (B) compared to 14028S, and indels shared by GJ0703 and CT18 are indicated
(A) 57 indels
14028S	indel position in this gene (bp)	insert (+)/ deletion (-)	nucleotide variation	GJ0703	indel position in this gene (bp)
STM14_0077	755	+	C	GJ0703GL003900	651
STM14_0077	759	-	T	GJ0703GL003900	654
STM14_0241	1005	+	C	GJ0703GL003739	1006
STM14_0241	1008	-	C	GJ0703GL003739	1008
STM14_0266	1659	-	A	GJ0703GL003715	1658
STM14_0266	1666	-	TG	GJ0703GL003715	1663
STM14_0746	830	-	GGCGGCTCCAGC	GJ0703GL003280	818
STM14_0817	982	+	TTATTGTGA	GJ0703GL003223	928
STM14_1084	1289	+	GGC	GJ0703GL002997	1349
STM14_1084	1295	+	T	GJ0703GL002997	1356
STM14_1084	1302	+	AA	GJ0703GL002997	1365
STM14_1084	1304	+	C	GJ0703GL002997	1368
STM14_1084	1305	+	GG	GJ0703GL002997	1371
STM14_1084	2239	+	AGCCGCAGTATCAGCAGCCGCAACAGCCGGTAGCGCCGC	GJ0703GL002997	2344
STM14_1084	2426	-	GCCGCAGTATCAGCAGCCGCAGCAGCCGGT	GJ0703GL002997	2501
STM14_1084	2430	-	GCG	GJ0703GL002997	2502
STM14_1084	2439	-	CAGCCA	GJ0703GL002997	2505
STM14_1084	2495	-	GCCACAGTATCAGCAGCCGGT	GJ0703GL002997	2540
STM14_1084	2499	-	GCG	GJ0703GL002997	2541
STM14_1084	2508	-	CAGCCA	GJ0703GL002997	2544
STM14_1110	1031	+	A	GJ0703GL002976	1032
STM14_1110	1036	-	C	GJ0703GL002976	1036
STM14_1125	893	+	GCCGGT	GJ0703GL002961	971
STM14_1348	606	+	AGCTCT	GJ0703GL002825	612
STM14_1357	3022	+	ACG	GJ0703GL002817	3016
STM14_2390	1044	+	AGTACC	GJ0703GL001989	963
STM14_2395	759	+	CAACCG	GJ0703GL001984	765
STM14_2996	318	+	G	GJ0703GL001466	318
STM14_2996	315	-	A	GJ0703GL001466	314
STM14_3084	410	+	CGA	GJ0703GL001387	365
STM14_3084	414	+	AGC	GJ0703GL001387	372
STM14_3345	2889	+	GGC	GJ0703GL001198	2835
STM14_3552	623	+	C	GJ0703GL001016	624
STM14_3552	626	-	A	GJ0703GL001016	626
STM14_3893	311	+	GGA	GJ0703GL000698	335
STM14_3967	828	+	C	GJ0703GL000631	829
STM14_3967	860	+	G	GJ0703GL000631	861
STM14_3967	837	-	A	GJ0703GL000631	837
STM14_3967	863	-	A	GJ0703GL000631	863
STM14_3968	194	+	G	GJ0703GL000630	195
STM14_3968	201	-	G	GJ0703GL000630	201
STM14_4186	771	-	G	GJ0703GL000443	830
STM14_4327	441	+	C	GJ0703GL000260	441
STM14_4327	438	-	T	GJ0703GL000260	437
STM14_4647	123	+	CG	GJ0703GL004797	117
STM14_4647	207	+	AC	GJ0703GL004797	201
STM14_4647	115	-	GC	GJ0703GL004797	107
STM14_4647	199	-	GG	GJ0703GL004797	191
STM14_4921	497	+	GCA	GJ0703GL004557	407
STM14_5004	599	+	A	GJ0703GL004502	599
STM14_5004	597	-	T	GJ0703GL004502	596
STM14_5005	1815	-	GCCGCACAAACT	GJ0703GL004501	1803
STM14_5147	1893	+	C	GJ0703GL004376	1893
STM14_5147	1891	-	A	GJ0703GL004376	1890
STM14_5497	1000	+	C	GJ0703GL003994	1001
STM14_5497	1004	-	A	GJ0703GL003994	1004
STM14_951	1193	-	CGG	GJ0703GL003113	1190
(B) 79 indels
14028S	indel position in this gene (bp)	insert (+)/ deletion (-)	nucleotide variation	CT18	indel position in this gene (bp)
STM14_0112	1410	-	CCA	STY0108	1407
STM14_0112	1422	-	AT	STY0108	1417
STM14_0112	1425	-	G	STY0108	1419
STM14_0212	1211	+	T	STY0197	1205
STM14_0212	1209	-	C	STY0197	1202
STM14_0223	2262	+	T	STY0214	2229
STM14_0223	2259	-	G	STY0214	2225
STM14_0241	1005	+	C	STY0223	1006
STM14_0241	1008	-	C	STY0223	1008
STM14_0266	1659	-	A	STY0247	1658
STM14_0266	1666	-	TG	STY0247	1663
STM14_0402	444	-	C	STY0378	443
STM14_0438	1799	+	G	STY0405	1746
STM14_0438	1806	+	GC	STY0405	1754
STM14_0438	1808	+	G	STY0405	1757
STM14_0438	1803	-	G	STY0405	1749
STM14_0467	3090	+	A	STY0429	3085
STM14_0467	2891	-	GCTGGC	STY0429	2885
STM14_0624	422	+	T	STY0582	423
STM14_0624	426	-	G	STY0582	426
STM14_0635	490	-	CCA	STY0589	502
STM14_0746	830	-	GGCGGCTCCAGC	STY0689	818
STM14_0815	1353	+	A	STY0736	1353
STM14_0815	1351	-	A	STY0736	1350
STM14_0822	1975	+	AAGAACAGGCGCGTCTCGCCAGCG	STY0744	1999
STM14_1084	1289	+	GGC	STY0958	1292
STM14_1084	1295	+	T	STY0958	1299
STM14_1084	2182	+	CTGTAGCGCCGCAGCCGCAGTATCAGCAGC	STY0958	2203
STM14_1084	2198	+	ACAGTATCAGCAGCCGCAGCAGCCGGTAGCG	STY0958	2250
STM14_1084	2199	+	CG	STY0958	2253
STM14_1084	1303	-	CCC	STY0958	1304
STM14_1084	1305	-	T	STY0958	1305
STM14_1084	1311	-	GCCG	STY0958	1307
STM14_1084	1323	-	TTTAT	STY0958	1314
STM14_1110	1031	+	A	STY0981	1032
STM14_1110	1036	-	C	STY0981	1036
STM14_1125	893	+	GCCGGT	STY0997	899
STM14_1333	10	-	T	STY1202	76
STM14_1359	920	+	A	STY1227	920
STM14_1359	918	-	C	STY1227	917
STM14_1372	992	-	GTACCT	STY1238	986
STM14_1395	402	-	GTC	STY1260	399
STM14_1928	517	+	CGCAGC	STY1472	397
STM14_1930	155	+	ATC	STY1470	158
STM14_2015	789	+	G	STY1396	790
STM14_2015	795	+	TG	STY1396	798
STM14_2395	691	+	AGGTGG	STY2182	697
STM14_2395	759	+	CAACCG	STY2182	771
STM14_2408	493	-	GTCTGGCGC	STY2194	484
STM14_2523	21	-	A	STY2240	66
STM14_2969	1307	-	G	STY2654	1306
STM14_3025	194	-	GCAGCC	STY2703	188
STM14_3084	407	+	CGCC	STY2761	411
STM14_3084	412	+	CA	STY2761	418
STM14_3095	600	-	GACGCAAACGCCAGCGCCA	STY2769	581
STM14_3095	612	-	CGGCGGCGGCG	STY2769	582
STM14_3345	2889	+	GGC	STY2891	2892
STM14_3527	197	-	GACGCAACAAAC	STY3050	185
STM14_3799	64	-	CAG	STY3309	61
STM14_3893	311	+	GGA	STY3394	314
STM14_3946	1045	+	CGCAGCCTG	STY3447	1054
STM14_3968	194	+	G	STY3466	195
STM14_3968	201	-	G	STY3466	201
STM14_4042	619	+	A	STY3529a	586
STM14_4042	610	-	A	STY3529a	576
STM14_4186	771	-	G	STY4320	770
STM14_4242	723	+	A	STY4280	724
STM14_4242	727	-	A	STY4280	727
STM14_4327	441	+	C	STY4205	441
STM14_4327	438	-	T	STY4205	437
STM14_4382	886	-	TGGCGCAGGAAAAAAATCTGGCGGCGTTCCGCGGCTATTCCTGCGATACCGCGACGAAGC	STY4162	826
STM14_4406	938	+	A	STY4144	938
STM14_4406	936	-	G	STY4144	935
STM14_4435	149	-	AGA	STY4118	146
STM14_4446	200	-	AGA	STY4108	197
STM14_4884	293	-	TCTGTT	STY3810	287
STM14_4921	497	+	GCAGCAGCAGCAGCAGCA	STY3777	515
STM14_5078	278	-	TGC	STY4420	275
STM14_951	1189	+	GTG	STY0855	1192
